# Supplementary material for: Cadmium and manganese hypophosphite perovskites templated by formamidinium cations: dielectric, optical and magnetic properties
Source: Royal Society of Chemistry journal article supplement (doi:10.1039/d0dt03995k), 2021-01-01
Supplement: d0dt03995k1.pdf [file d0dt03995k1.pdf]

"Cadmium and manganese hypophosphite perovskites templated by  
formamidinium cations: dielectric, optical and magnetic properties"

by Mirosław Mączka, Dagmara Stefańska, Maciej Ptak, Anna Gągor, Adam Pikul and Adam  
Sieradzki

**Table S1.** Experimental details

For all structures:  $\text{CH}_{11}\text{CdN}_2\text{O}_6\text{P}_3$ ,  $M_r = 352.43$ ,  $Z = 4$ . Experiments were carried out with Mo  $K\alpha$  radiation using a Xcalibur, Atlas. Absorption was corrected for by multi-scan methods, *CrysAlis PRO* 1.171.38.41 (Rigaku Oxford Diffraction, 2015). Empirical absorption correction using spherical harmonics, implemented in SCALE3 ABSPACK scaling algorithm.

|                                                                   | PhaseI                                             | PhaseII                              |
|-------------------------------------------------------------------|----------------------------------------------------|--------------------------------------|
| <b>Crystal data</b>                                               |                                                    |                                      |
| Crystal system, space group                                       | Monoclinic, $C2/c$                                 | Monoclinic, $P2_1/n$                 |
| Temperature (K)                                                   | 295                                                | 100                                  |
| $a, b, c$ (Å)                                                     | 13.6653 (4), 10.3708 (3), 7.5573 (3)               | 13.7142 (2), 10.3493 (3), 7.4175 (5) |
| $\beta$ (°)                                                       | 103.058 (3)                                        | 103.390 (4)                          |
| $V$ (Å <sup>3</sup> )                                             | 1043.33 (6)                                        | 1024.16 (8)                          |
| $\mu$ (mm <sup>-1</sup> )                                         | 2.55                                               | 2.60                                 |
| Crystal size (mm)                                                 | 0.18 × 0.13 × 0.08                                 | 0.18 × 0.13 × 0.08                   |
| <b>Data collection</b>                                            |                                                    |                                      |
| $T_{\min}, T_{\max}$                                              | 0.853, 1.000                                       | 0.780, 1.000                         |
| No. of measured and independent reflections                       | 13593, 1384, 1225<br>observed [ $I > 2\sigma(I)$ ] | 24109, 2090, 1646                    |
| $R_{\text{int}}$                                                  | 0.030                                              | 0.044                                |
| $(\sin \theta/\lambda)_{\text{max}}$ (Å <sup>-1</sup> )           | 0.692                                              | 0.625                                |
| <b>Refinement</b>                                                 |                                                    |                                      |
| $R[F^2 > 2\sigma(F^2)], wR(F^2), S$                               | 0.018, 0.046, 1.07                                 | 0.028, 0.058, 1.08                   |
| No. of reflections                                                | 1384                                               | 2090                                 |
| No. of parameters                                                 | 81                                                 | 155                                  |
| $\Delta)_{\text{max}}, \Delta)_{\text{min}}$ (e Å <sup>-3</sup> ) | 0.41, -0.35                                        | 0.75, -0.63                          |

Computer programs: *CrysAlis PRO* 1.171.38.41 (Rigaku OD, 2015), *SHELXT* 2014/5 (Sheldrick, 2014), *SHELXL2018/3* (Sheldrick, 2018).

**Table S2.** Selected geometric parameters (Å, °)

| <i>Phase I, 295 K</i>                   |             | <i>Phase II, 100 K</i>                   |             |
|-----------------------------------------|-------------|------------------------------------------|-------------|
| Cd1—O1                                  | 2.2756 (18) | Cd1—O1                                   | 2.274 (3)   |
| Cd1—O1 <sup>i</sup>                     | 2.2757 (18) | Cd1—O3                                   | 2.274 (2)   |
| Cd1—O2                                  | 2.2820 (13) | Cd1—O5                                   | 2.276 (2)   |
| Cd1—O2 <sup>i</sup>                     | 2.2820 (13) | Cd1—O2 <sup>vi</sup>                     | 2.280 (3)   |
| Cd1—O3 <sup>ii</sup>                    | 2.2867 (14) | Cd1—O4 <sup>iii</sup>                    | 2.290 (2)   |
| Cd1—O3 <sup>iii</sup>                   | 2.2867 (14) | Cd1—O6 <sup>vii</sup>                    | 2.297 (2)   |
| P2—O3                                   | 1.4893 (15) | P1—O1                                    | 1.486 (3)   |
| P2—O2                                   | 1.5020 (15) | P1—O2                                    | 1.493 (3)   |
| P1—O1 <sup>iv</sup>                     | 1.4794 (18) | P2—O4                                    | 1.500 (2)   |
| P1—O1                                   | 1.4794 (18) | P2—O3                                    | 1.515 (2)   |
| N1—C1                                   | 1.307 (5)   | P3—O6                                    | 1.500 (2)   |
| N2—C1                                   | 1.279 (6)   | P3—O5                                    | 1.514 (2)   |
|                                         |             | N1A—C1A                                  | 1.319 (10)  |
|                                         |             | N2A—C1A                                  | 1.290 (13)  |
|                                         |             | N2B—C1B                                  | 1.285 (18)  |
| O1—Cd1—O1 <sup>i</sup>                  | 180.00 (9)  | O1—Cd1—O3                                | 88.56 (9)   |
| O1—Cd1—O2                               | 87.51 (7)   | O1—Cd1—O5                                | 90.98 (9)   |
| O1 <sup>i</sup> —Cd1—O2                 | 92.49 (7)   | O3—Cd1—O5                                | 178.96 (8)  |
| O1—Cd1—O2 <sup>i</sup>                  | 92.49 (7)   | O1—Cd1—O2 <sup>vi</sup>                  | 178.57 (11) |
| O1 <sup>i</sup> —Cd1—O2 <sup>i</sup>    | 87.51 (7)   | O3—Cd1—O2 <sup>vi</sup>                  | 92.24 (9)   |
| O2—Cd1—O2 <sup>i</sup>                  | 180.0       | O5—Cd1—O2 <sup>vi</sup>                  | 88.24 (9)   |
| O1—Cd1—O3 <sup>ii</sup>                 | 91.40 (7)   | O1—Cd1—O4 <sup>iii</sup>                 | 90.82 (10)  |
| O1 <sup>i</sup> —Cd1—O3 <sup>ii</sup>   | 88.60 (7)   | O3—Cd1—O4 <sup>iii</sup>                 | 89.27 (8)   |
| O2—Cd1—O3 <sup>ii</sup>                 | 90.61 (5)   | O5—Cd1—O4 <sup>iii</sup>                 | 89.80 (8)   |
| O2 <sup>i</sup> —Cd1—O3 <sup>ii</sup>   | 89.39 (5)   | O2 <sup>vi</sup> —Cd1—O4 <sup>iii</sup>  | 90.38 (10)  |
| O1—Cd1—O3 <sup>iii</sup>                | 88.60 (7)   | O1—Cd1—O6 <sup>vii</sup>                 | 89.95 (10)  |
| O1 <sup>i</sup> —Cd1—O3 <sup>iii</sup>  | 91.40 (7)   | O3—Cd1—O6 <sup>vii</sup>                 | 90.70 (8)   |
| O2—Cd1—O3 <sup>iii</sup>                | 89.39 (5)   | O5—Cd1—O6 <sup>vii</sup>                 | 90.23 (8)   |
| O2 <sup>i</sup> —Cd1—O3 <sup>iii</sup>  | 90.61 (5)   | O2 <sup>vi</sup> —Cd1—O6 <sup>vii</sup>  | 88.85 (10)  |
| O3 <sup>ii</sup> —Cd1—O3 <sup>iii</sup> | 180.00 (9)  | O4 <sup>iii</sup> —Cd1—O6 <sup>vii</sup> | 179.23 (10) |
| O3—P2—O2                                | 118.25 (9)  | O1—P1—O2                                 | 115.19 (15) |
| O1 <sup>iv</sup> —P1—O1                 | 114.66 (15) | O4—P2—O3                                 | 117.39 (14) |
| P2—O2—Cd1                               | 131.89 (9)  | O6—P3—O5                                 | 117.79 (14) |
| P2—O3—Cd1 <sup>v</sup>                  | 132.80 (9)  | P1—O1—Cd1                                | 143.09 (16) |
| P1—O1—Cd1                               | 142.49 (11) | P1—O2—Cd1 <sup>viii</sup>                | 139.36 (16) |

|          |           |                         |             |
|----------|-----------|-------------------------|-------------|
| N2—C1—N1 | 121.6 (4) | P2—O3—Cd1               | 129.55 (13) |
|          |           | P2—O4—Cd1 <sup>v</sup>  | 132.69 (13) |
|          |           | P3—O5—Cd1               | 129.47 (13) |
|          |           | P3—O6—Cd1 <sup>ix</sup> | 130.65 (13) |
|          |           | N2A—C1A—N1A             | 122.9 (8)   |

---

Symmetry code(s): (i)  $-x+3/2, -y+3/2, -z+1$ ; (ii)  $x, -y+1, z-1/2$ ; (iii)  $-x+3/2, y+1/2, -z+3/2$ ; (iv)  $-x+1, y, -z+1/2$ ; (v)  $-x+3/2, y-1/2, -z+3/2$ ; (vi)  $x+1/2, -y+3/2, z+1/2$ ; (vii)  $-x+3/2, y-1/2, -z+1/2$ ; (viii)  $x-1/2, -y+3/2, z-1/2$ ; (ix)  $-x+3/2, y+1/2, -z+1/2$ .

**Table S3.** Distortion Parameters in selected hypophosphites,  $\Delta d$  - bond length distortion;  $\sigma^2$  octahedral angle variance [1].

| Compound                                 | T (K) | Space group             | Independent Mn Centres | $\sigma^2$ (°) | $\Delta d \cdot 10^{-5}$ |
|------------------------------------------|-------|-------------------------|------------------------|----------------|--------------------------|
| [MHy]Mn(H <sub>2</sub> POO) <sub>3</sub> | 295   | <i>Pnma</i>             | 1                      | 8.7            | 3.0                      |
| [MHy]Mn(H <sub>2</sub> POO) <sub>3</sub> | 100   | <i>Pnma</i>             | 1                      | 8.4            | 3.5                      |
| [DMA]Mn(H <sub>2</sub> POO) <sub>3</sub> | 298   | <i>P2<sub>1</sub>/c</i> | 1                      | 4.1            | 3.3                      |
|                                          |       |                         | 2                      | 9.0            | 7.8                      |
|                                          |       |                         | 3                      | 9.1            | 2.6                      |
| [FA]Mn(H <sub>2</sub> POO) <sub>3</sub>  | 295   | <i>C2/c</i>             | 1                      | 3.3            | 0.09                     |
| [FA]Mn(H <sub>2</sub> POO) <sub>3</sub>  | 115   | <i>P2<sub>1</sub>/n</i> | 1                      | 4.5            | 7.7                      |
| [GUA]Mn(H <sub>2</sub> POO) <sub>3</sub> | 298   | <i>I2/m</i>             | 1                      | 2.3            | 32.0                     |
| [GUA]Mn(H <sub>2</sub> POO) <sub>3</sub> | 302   | <i>P-1</i>              | 1                      | 13.5           | 8.7                      |
|                                          |       |                         | 2                      | 4.7            | 7.1                      |
| [FA]Cd(H <sub>2</sub> POO) <sub>3</sub>  | 295   | <i>C2/c</i>             | 1                      | 3.1            | 0.4                      |
| [FA]Cd(H <sub>2</sub> POO) <sub>3</sub>  | 100   | <i>P2<sub>1</sub>/n</i> | 1                      | 1.4            | 1.5                      |

**Table S4.** Selected hydrogen-bond parameters

| $D-H\cdots A$                        | $D-H$ (Å) | $H\cdots A$ (Å) | $D\cdots A$ (Å) | $D-H\cdots A$ (°) |
|--------------------------------------|-----------|-----------------|-----------------|-------------------|
| Phase I                              |           |                 |                 |                   |
| N1—H1A $\cdots$ O2                   | 0.86      | 2.01            | 2.843 (2)       | 162.1             |
| N1—H1B $\cdots$ O2 <sup>i</sup>      | 0.86      | 2.07            | 2.843 (2)       | 148.9             |
| N2—H2A $\cdots$ O3 <sup>ii</sup>     | 0.86      | 1.99            | 2.831 (5)       | 164.4             |
| N2—H2B $\cdots$ O1 <sup>iii</sup>    | 0.86      | 2.45            | 3.247 (5)       | 154.6             |
| N2—H2B $\cdots$ O1 <sup>iv</sup>     | 0.86      | 2.22            | 2.936 (5)       | 141.1             |
| C1—H1C $\cdots$ O3 <sup>v</sup>      | 0.93      | 2.26            | 3.185 (4)       | 173.5             |
| Phase II                             |           |                 |                 |                   |
| N1A—H1A1 $\cdots$ O5 <sup>vi</sup>   | 0.86      | 1.99            | 2.820 (3)       | 163.2             |
| N2A—H2A1 $\cdots$ O6 <sup>viii</sup> | 0.86      | 2.01            | 2.852 (7)       | 167.5             |
| N2A—H2A2 $\cdots$ O1 <sup>viii</sup> | 0.86      | 2.30            | 2.968 (7)       | 135.0             |
| N2A—H2A2 $\cdots$ O2 <sup>viii</sup> | 0.86      | 2.34            | 3.154 (7)       | 159.1             |
| C1A—H1A $\cdots$ O4                  | 0.93      | 2.22            | 3.152 (10)      | 175.4             |
| N1B—H1B1 $\cdots$ O3 <sup>vii</sup>  | 0.86      | 1.99            | 2.824 (3)       | 163.1             |
| N2B—H2B1 $\cdots$ O4                 | 0.86      | 2.00            | 2.847 (9)       | 167.9             |
| N2B—H2B2 $\cdots$ O1 <sup>viii</sup> | 0.86      | 2.53            | 3.335 (9)       | 156.2             |
| N2B—H2B2 $\cdots$ O2 <sup>viii</sup> | 0.86      | 2.15            | 2.859 (10)      | 139.3             |
| C1B—H1B $\cdots$ O6 <sup>viii</sup>  | 0.93      | 2.23            | 3.158 (13)      | 176.0             |

Symmetry code(s): (i)  $-x+1, y, -z+3/2$ ; (ii)  $-x+3/2, y+1/2, -z+3/2$ ; (iii)  $-x+1, -y+2, -z+1$ ; (iv)  $x, -y+2, z+1/2$ ; (v)  $x-1/2, y+1/2, z$ ; (vi)  $-x+2, -y+1, -z+1$ ; (vii)  $-x+3/2, y-1/2, -z+3/2$ ; (viii)  $x+1/2, -y+3/2, z+1/2$ .

**Table S5.** Raman wavenumbers ( $\text{cm}^{-1}$ ) of the  $[\text{FA}]\text{Cd}(\text{H}_2\text{POO})_3$  perovskite together with proposed assignment of observed bands.

| 300 K    | 80 K          | Assignment                                         |
|----------|---------------|----------------------------------------------------|
| 3310w    | 3318w         | $\nu(\text{NH}_2)$                                 |
| 3211w    | 3220w         | $\nu(\text{NH}_2)$                                 |
| 3095w    | 3088w         | $\nu(\text{NH}_2)$                                 |
| 3007w    | 2999w         | $\nu(\text{CH})$                                   |
|          | 2402w         | $\nu_s(\text{PH}_2)$                               |
| 2377 vs  | 2394vs+2382vs | $\nu_s(\text{PH}_2)$                               |
|          | 2366w         | $\nu_s(\text{PH}_2)$                               |
| 2341m    | 2343m         | $\nu_{\text{as}}(\text{PH}_2)$                     |
| 2316m    | 2320m         | $\nu_{\text{as}}(\text{PH}_2)$                     |
| 2306m    | 2310m         | $\nu_{\text{as}}(\text{PH}_2)$                     |
| 2273w    | 2271w         | $\nu_{\text{as}}(\text{PH}_2)$                     |
| 1406m    | 1401m         | $\delta(\text{CH})$                                |
| 1368vw   | 1384w         | $\rho(\text{NH}_2)$                                |
| 1164s    | 1175m+1167s   | $\nu_{\text{as}}(\text{PO}_2)+\delta(\text{PH}_2)$ |
| 1143s    | 1148w+1140s   | $\nu_{\text{as}}(\text{PO}_2)+\nu_s(\text{CN})$    |
| 1132sh   | 1133sh+1128sh | $\nu_{\text{as}}(\text{PO}_2)$                     |
| 1093w    | 1102w+1086w   | $\nu_s(\text{PO}_2)+\omega(\text{PH}_2)$           |
| 1069s    | 1069s+1065sh  | $\nu_s(\text{PO}_2)$                               |
| 1039s    | 1044s+1033s   | $\nu_s(\text{PO}_2)$                               |
| 942m     | 956m+939m     | $\tau(\text{PH}_2)$                                |
| 895w     | 892w          | $\tau(\text{PH}_2)$                                |
| 816m     | 823m          | $\rho(\text{PH}_2)$                                |
| 807w     | 808m+802m     | $\rho(\text{PH}_2)$                                |
| 689vw,vb | 729 m         | $\omega(\text{NH}_2)$                              |
| 566w     | 561w          | $\delta(\text{NCN})$                               |
| 500m     | 499m          | $\delta(\text{PO}_2)$                              |
| 471w     | 472m          | $\delta(\text{PO}_2)$                              |

|      |                 |                                                 |
|------|-----------------|-------------------------------------------------|
| 456m | 453m            | $\delta(\text{PO}_2)$                           |
| 290m | 310m            | $T'(\text{Cd}^{2+})$                            |
|      | 289w            | $T'(\text{Cd}^{2+})$                            |
| 240w | 261w            | $T'(\text{Cd}^{2+})+T'(\text{H}_2\text{POO}^-)$ |
|      | 234w+221w       | $T'(\text{Cd}^{2+})+T'(\text{H}_2\text{POO}^-)$ |
|      | 180w            | $T(\text{H}_2\text{POO}^-)$                     |
| 150m | 164vw+154m+136m | $T'(\text{FA}^+)+L(\text{H}_2\text{POO}^-)$     |
| 105m | 111m+103sh+95w  | $L(\text{FA}^+)+L(\text{H}_2\text{POO}^-)$      |
| 60w  | 85w+76w+65w     | $L(\text{H}_2\text{POO}^-)$                     |

<sup>a</sup>Key: vs, very strong; s, strong; m, medium; w, weak; vw, very weak; vb, very broad;  $\nu_s$ , symmetric stretching;  $\nu_{as}$ , antisymmetric stretching;  $\delta$ , bending (scissoring) or in-plane bending;  $\rho$ , rocking;  $\omega$ , wagging;  $\tau$ , twisting; T', translation; L, libration.



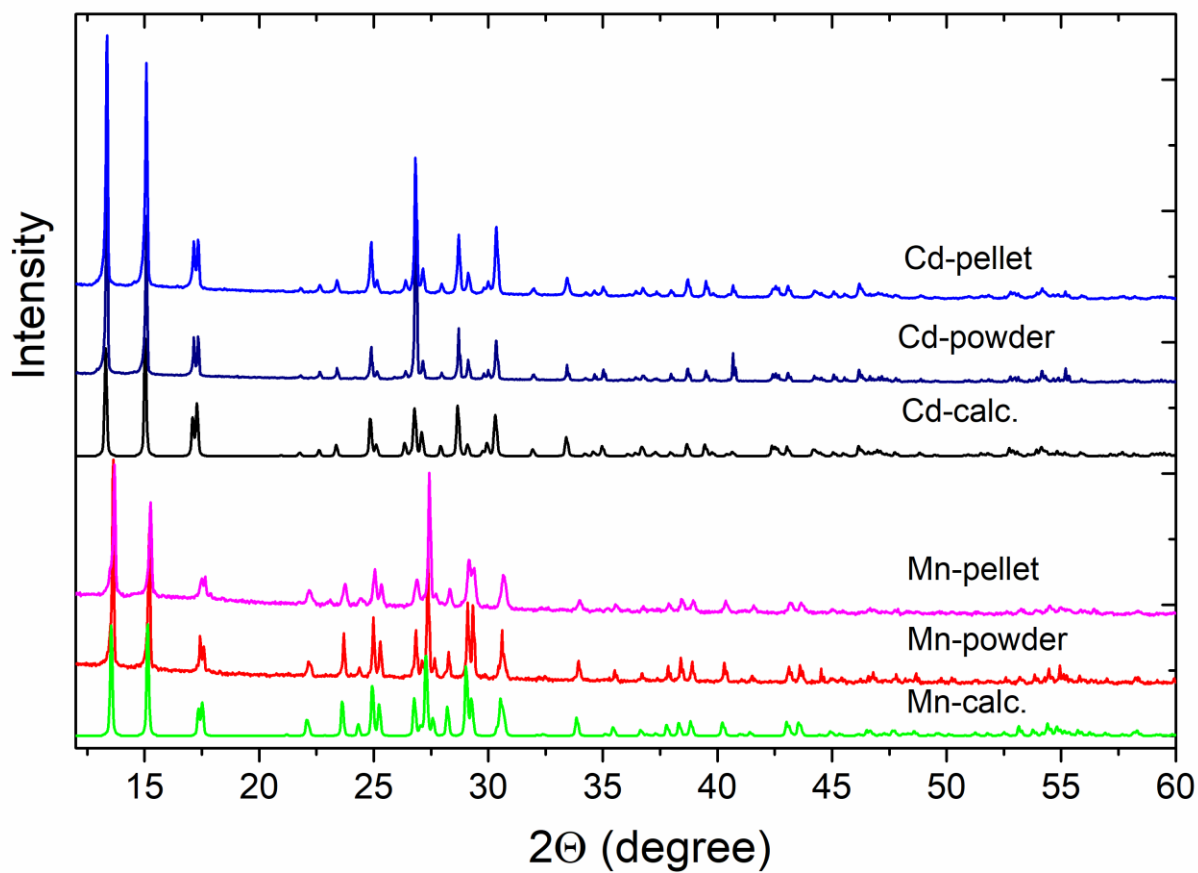

Figure S1. Experimental XRD patterns of powdered  $[\text{FA}]\text{M}(\text{H}_2\text{POO})_3$  ( $\text{M}=\text{Mn}$ ,  $\text{Cd}$ ) and pressed samples (pellets) together with the calculated ones based on the RT crystal structures.

**(a) Phase I, C2/c 295K;** only  $h+k=2n$  peaks are present

**(b) Phase II, P2<sub>1</sub>/n, 100 K;** diffraction peaks breaking the reflection conditions for C-centered lattice,  $h+k=2n+1$

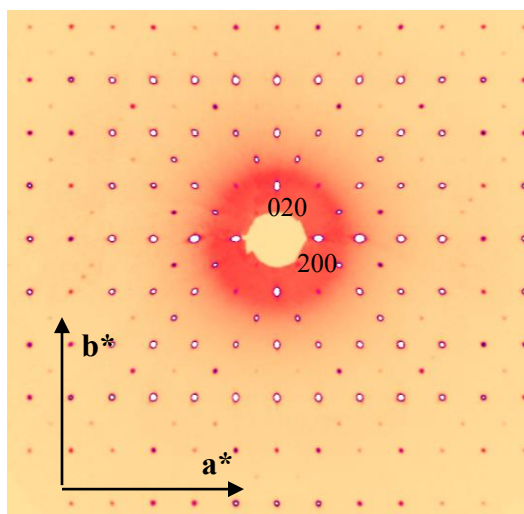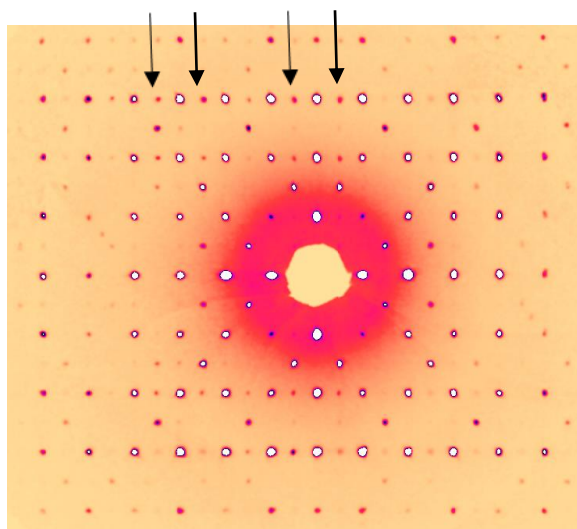

**(c) diffraction pictures taken below and above the phase transition temperature confirm symmetry changes**

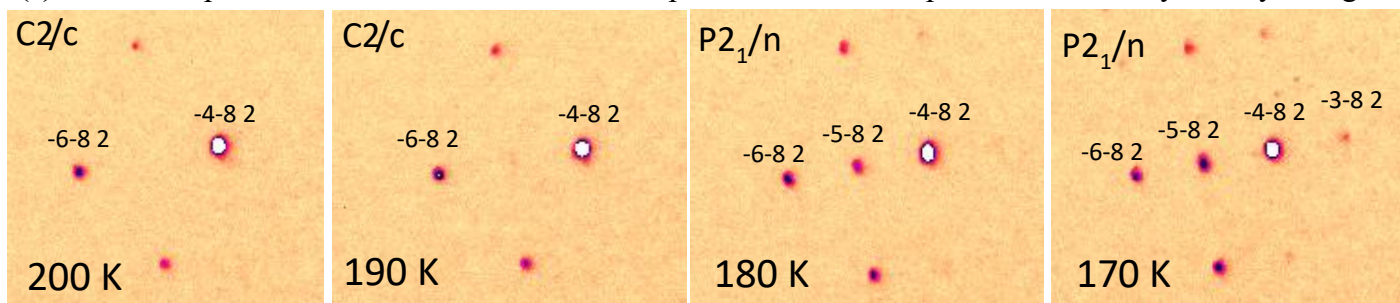

**(d)**

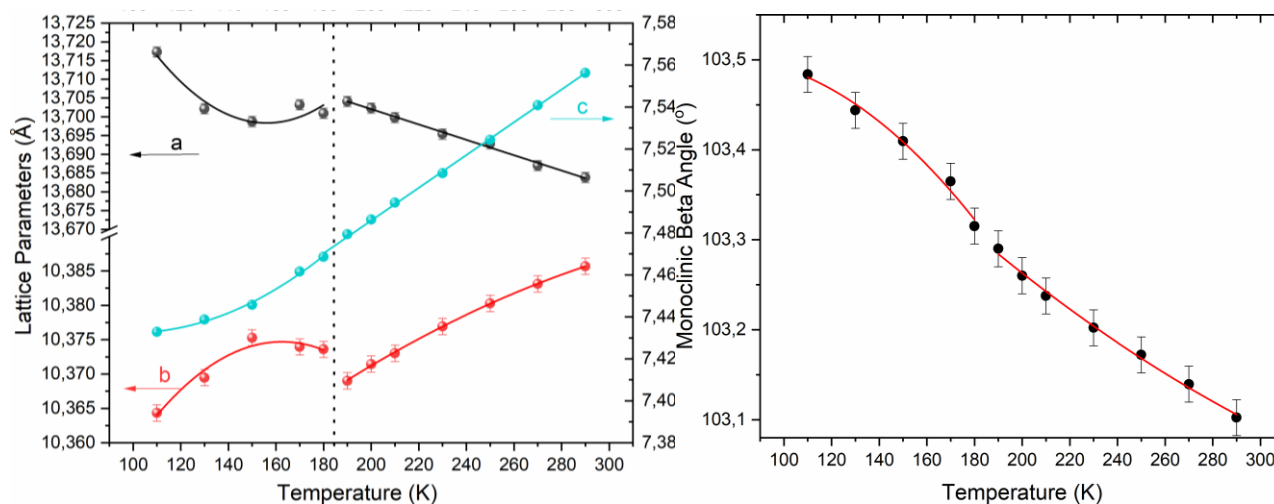

Figure S2. (a)-(b)  $hk0$  reciprocal planes in both phases of  $[\text{FA}]\text{Cd}(\text{H}_2\text{POO})_3$ ; (c) diffraction images near the phase transition temperature; (d) temperature evolution of lattice parameters.

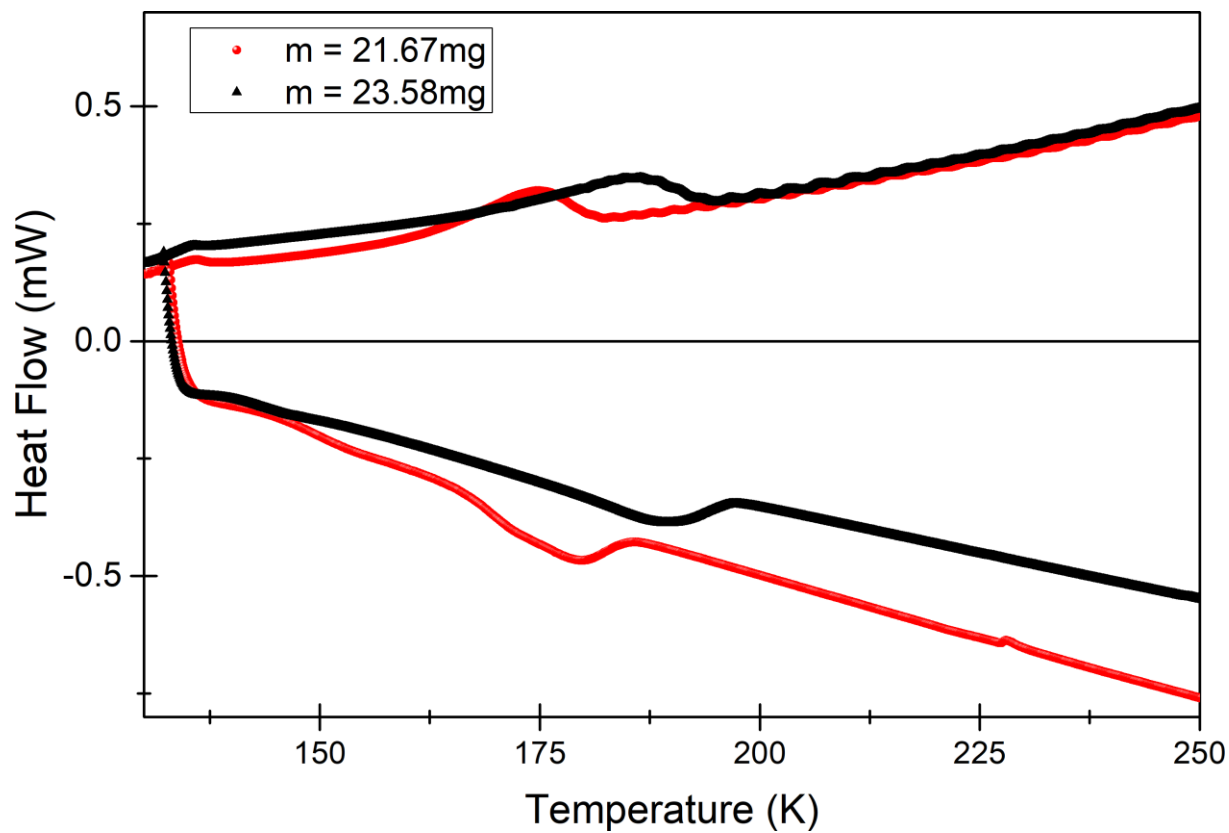

Figure S3. DSC traces of  $[\text{FA}]\text{Cd}(\text{H}_2\text{POO})_3$  (black) and  $[\text{FA}]\text{Mn}(\text{H}_2\text{POO})_3$  (red).

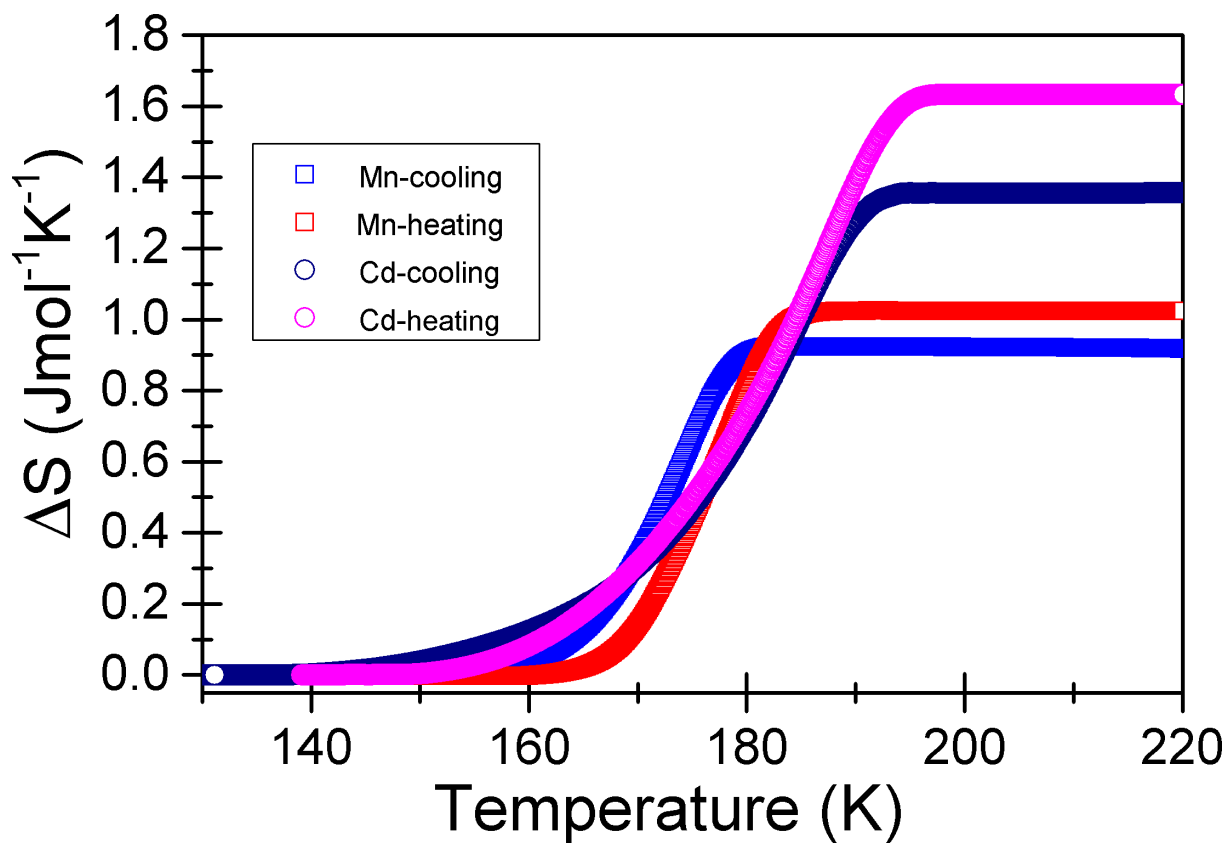

Figure S4. Temperature dependence of  $\Delta S$  related to the phase transitions in the Mn (squares) and Cd (circles) analogue in heating (red and magenta) and cooling (blue and navy) runs.

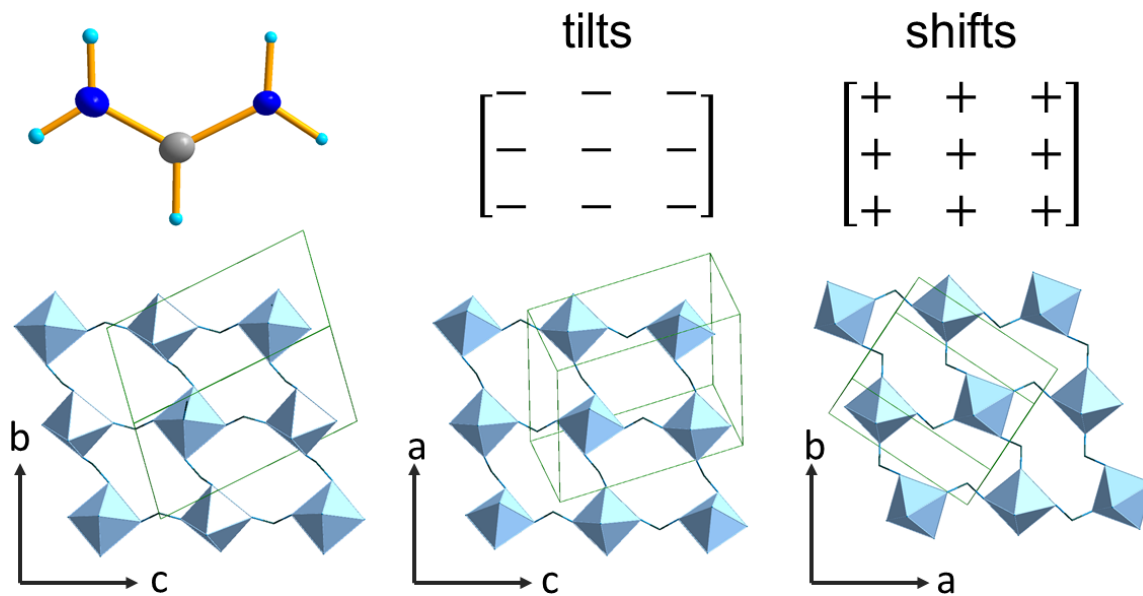

Figure S5. Tilts and shifts [2,3] in monoclinic  $[\text{FA}]\text{Cd}(\text{H}_2\text{POO})_3$  polymorph. Axes demonstrate pseudo-cubic directions; (above)  $\text{FA}^+$  with tilt and shift matrixes; (below) single 3 x 3 layers. The green cell refers to the monoclinic unit cell.

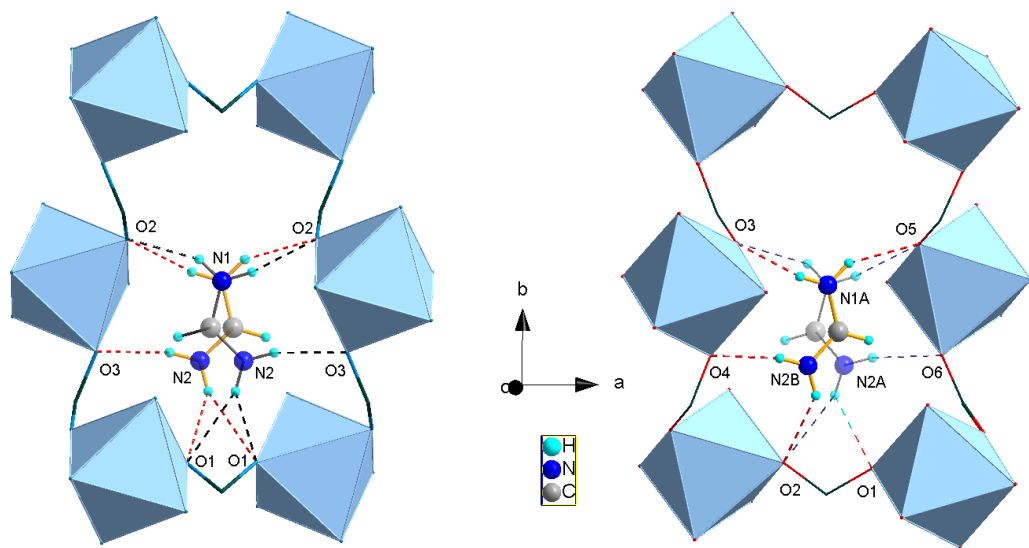

Figure S6. N-H...O HBs in the high (on the left) and low (on the right) temperature polymorphs with atom numbering scheme. The site occupation factors in phase I are equal to 0.5 for both placements in II it is equal to 0.4 and 0.6 for A and B amines, respectively.

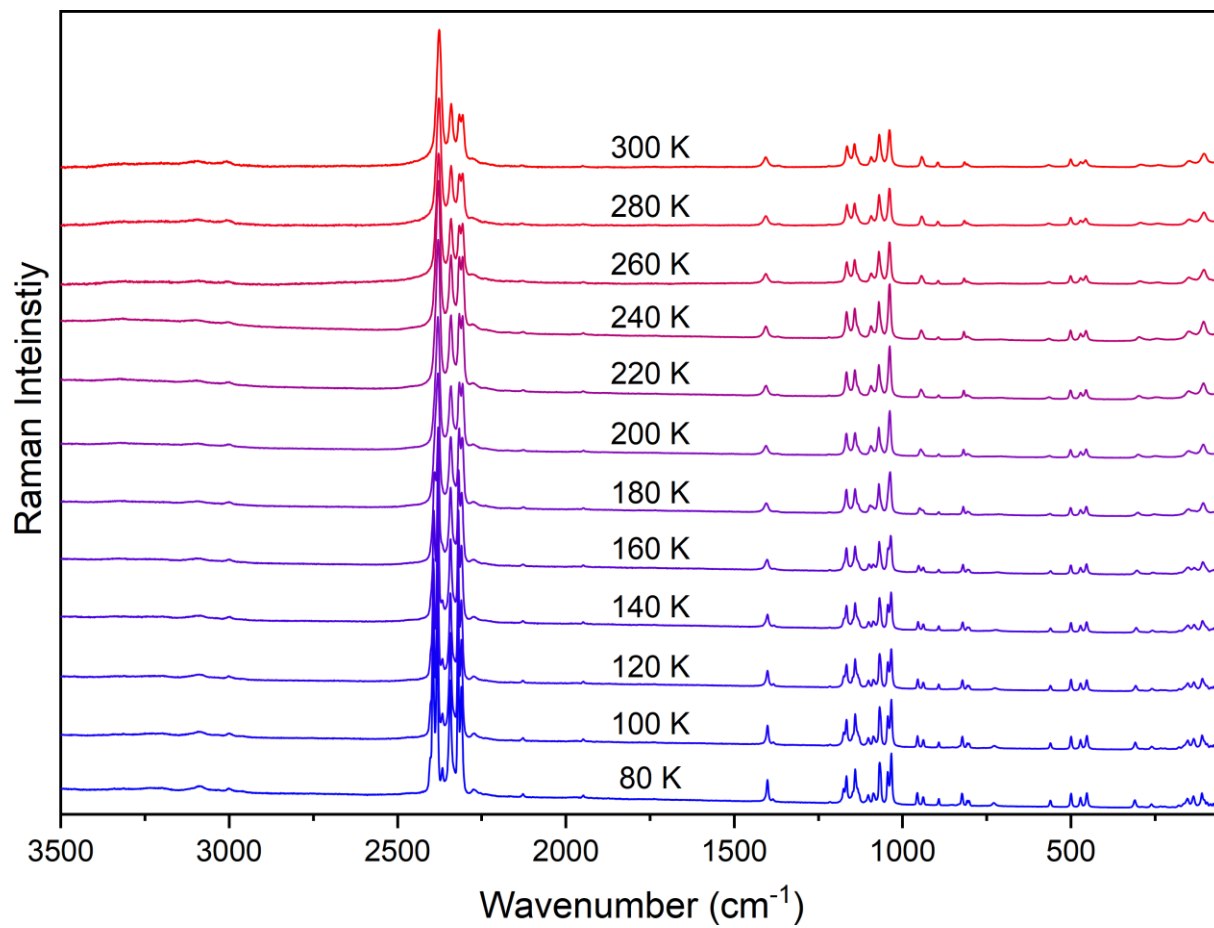

Figure S7. Temperature-dependent Raman spectra of [FA]Cd(H<sub>2</sub>POO)<sub>3</sub> in the whole wavenumber range.

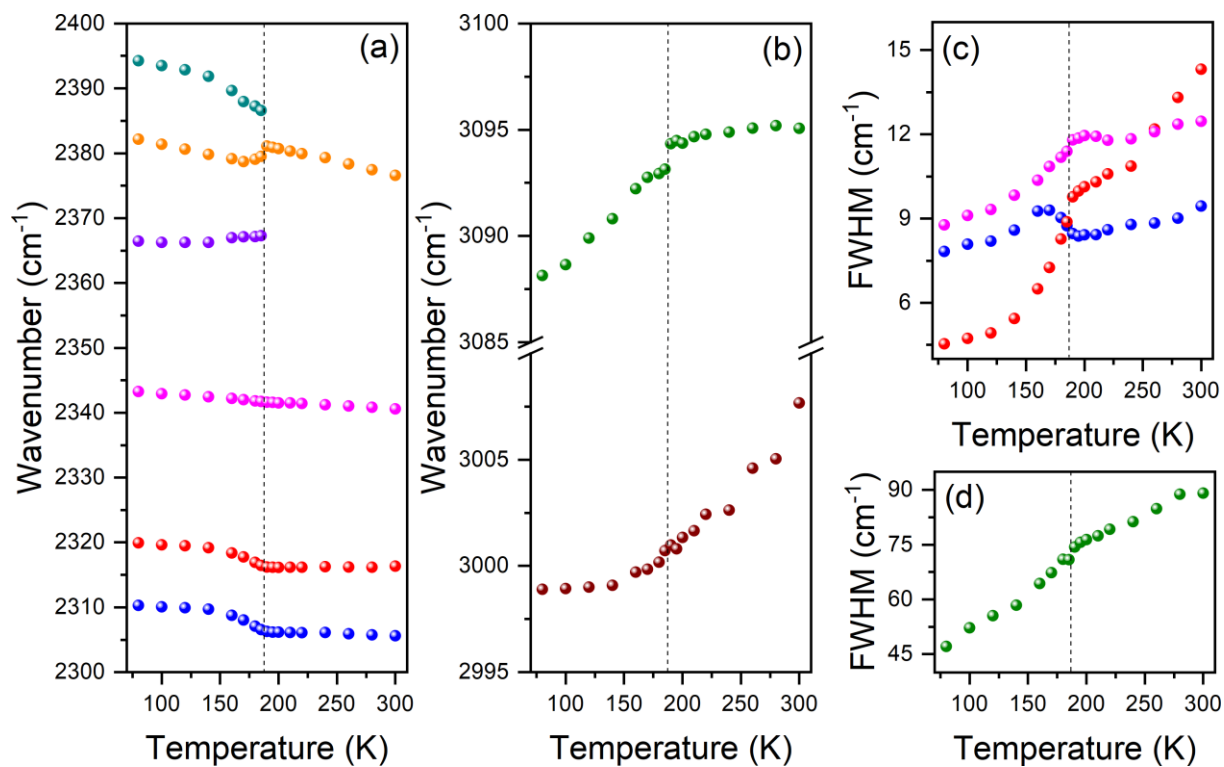

Figure S8. Temperature dependence of wavenumbers (a and b) and FWHM (c and d) for selected  $\text{PH}_2$ ,  $\text{NH}_2$  and  $\text{CH}$  stretching modes.



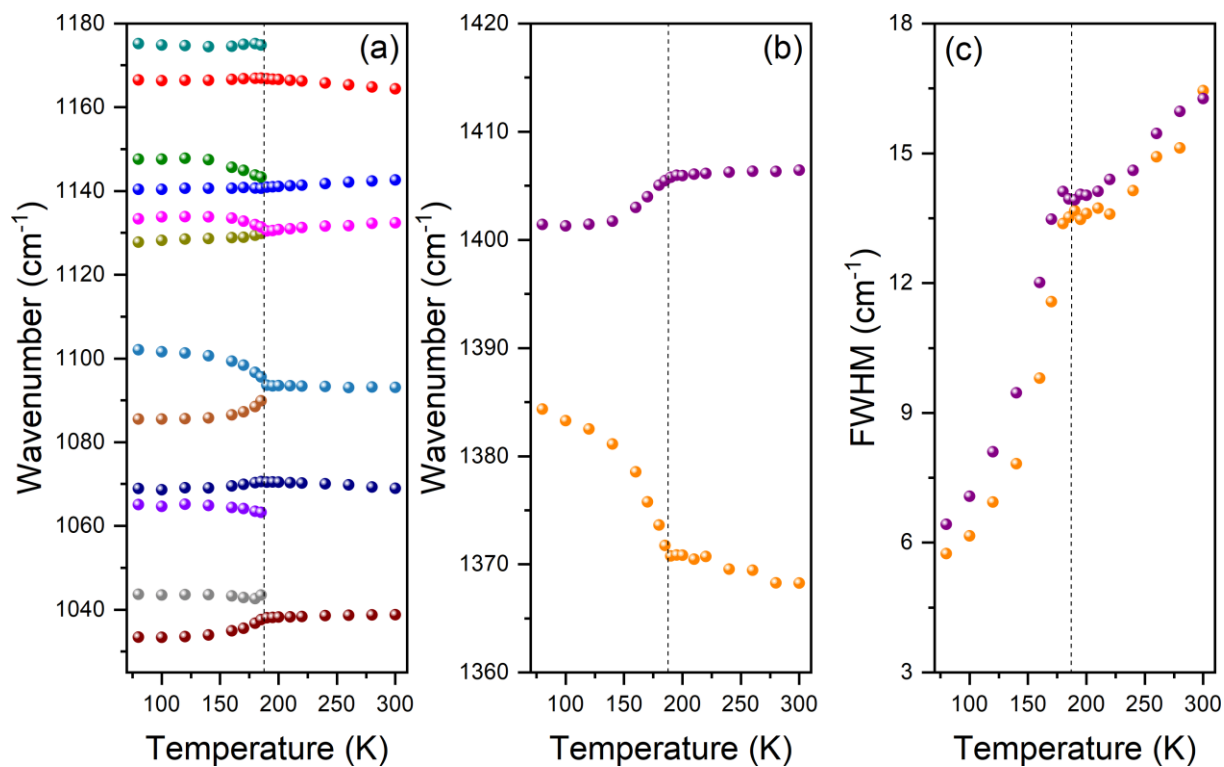

Figure S9. Temperature dependence of wavenumbers for PO<sub>2</sub> stretching modes (a). Panels (b) and (c) show temperature dependence of wavenumbers and FWHM, respectively, for ρ(NH<sub>2</sub>) and δ(CH) modes.

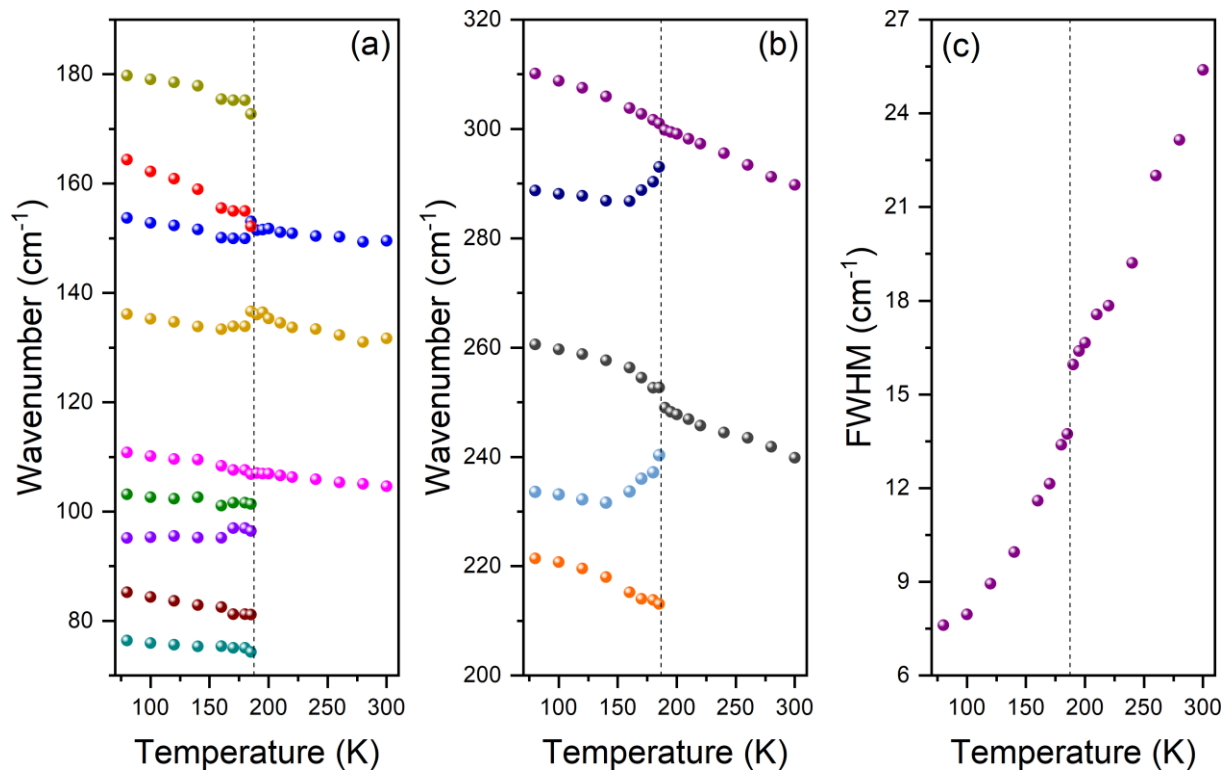

Figure S10. Temperature dependence of wavenumbers for lattice modes (a and b). Panel (c) shows temperature dependence of FWHM for the 290  $\text{cm}^{-1}$  lattice mode.

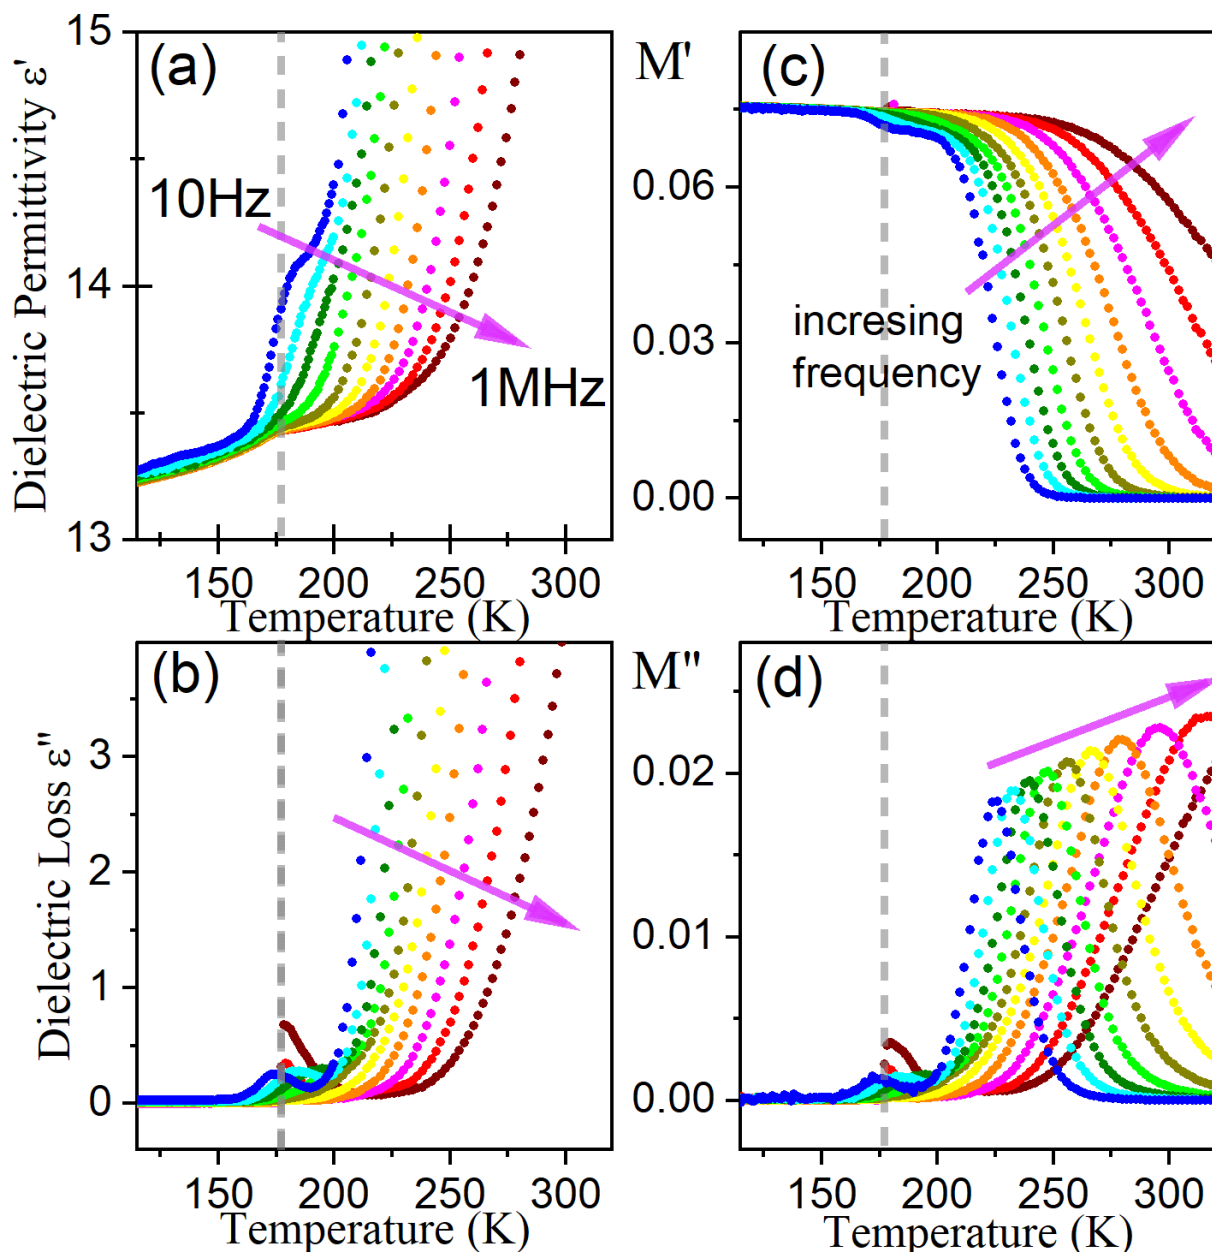

Figure S11. (a) Dielectric permittivity, (b) dielectric loss, (c) real and (d) imaginary components of electric modulus spectra as a function of temperature in  $[FA]Mn(H_2POO)_3$ . The representative curves are plotted in frequency decades between 10 Hz and 1 MHz. Dash line corresponds to the phase transition temperature taken from DSC measurements.

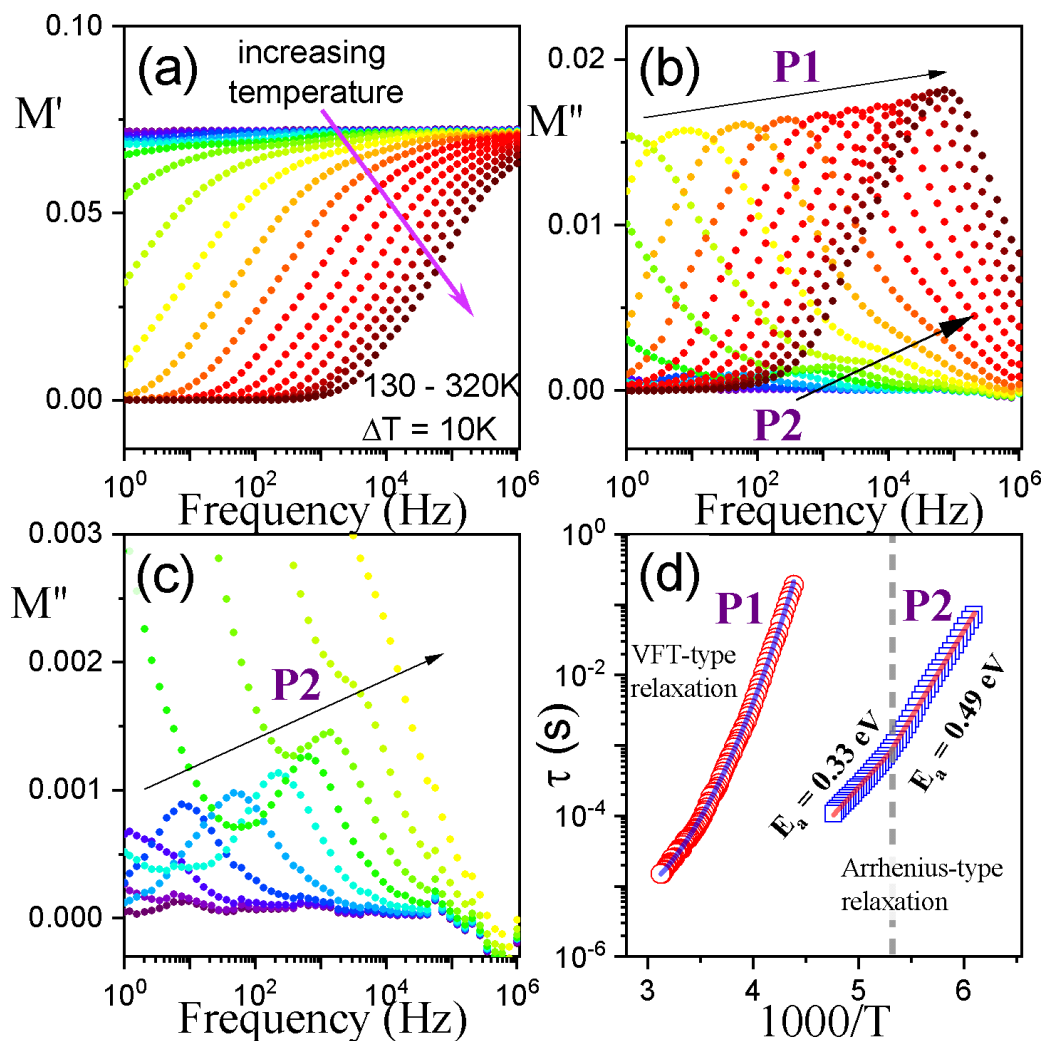

Figure S12. (a) Frequency dependence of  $M'$  and (b,c)  $M''$  for [FA]Cd(H<sub>2</sub>POO)<sub>3</sub> sample. The characteristic dipolar relaxation peaks shift to higher frequencies with increasing temperature, P2 process tends to Arrhenius behaviour while P1 process follows the VFT dependence. (d) The estimated relaxation times of FA<sup>+</sup> motion as a function of inverse temperature. Dash line corresponds to the structural phase transition temperature.

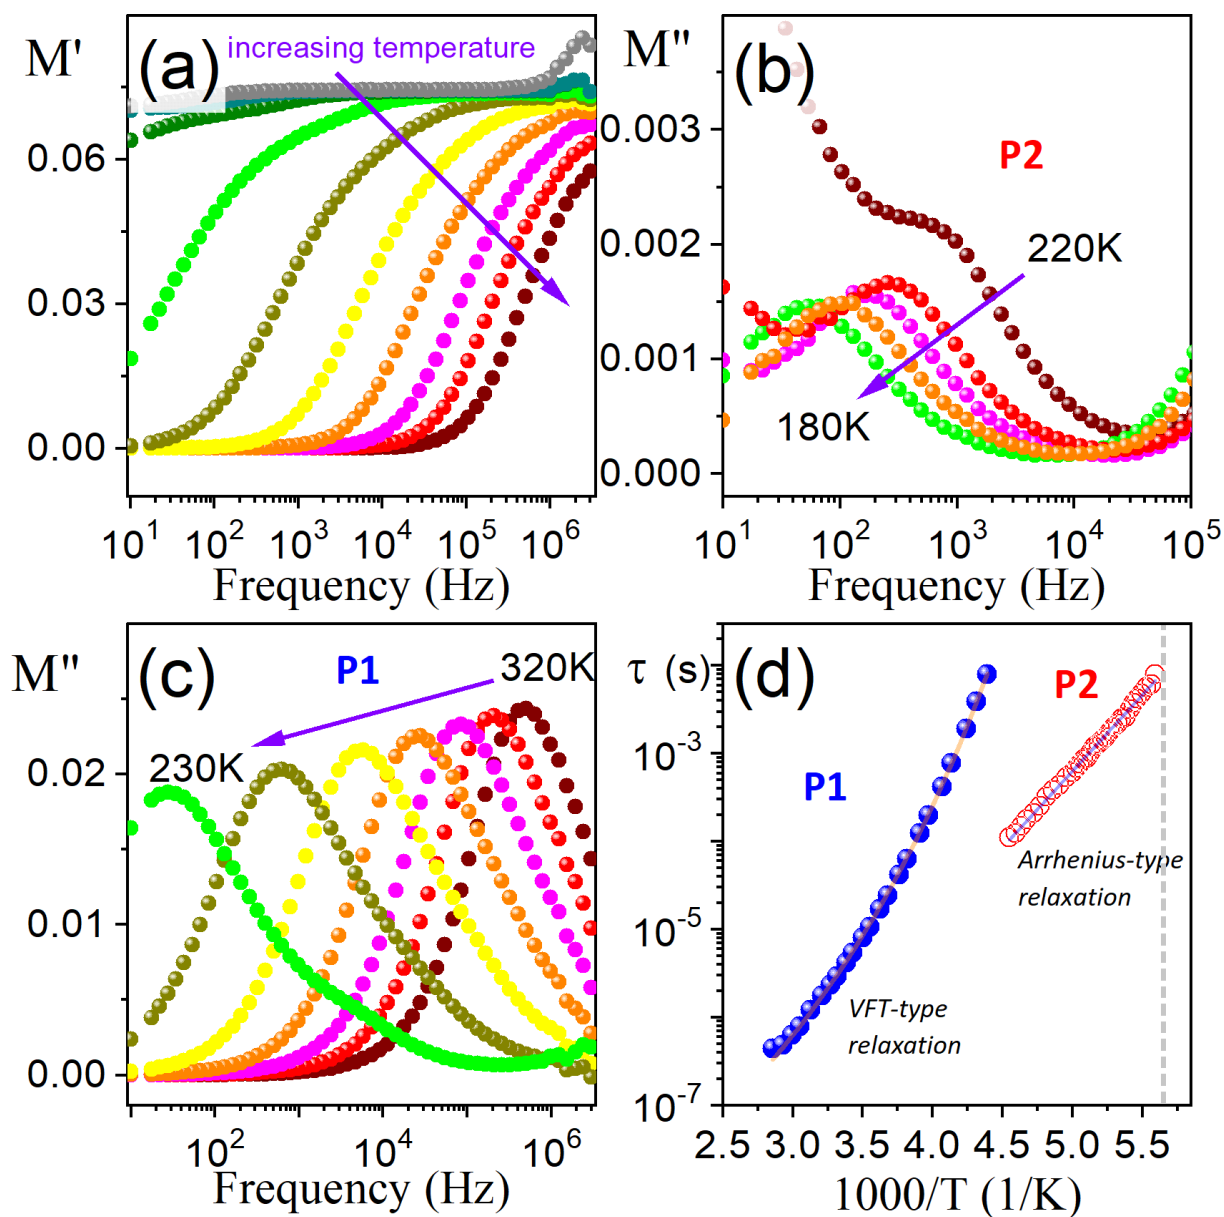

Figure S13. (a) Frequency dependence of  $M'$  and (b,c)  $M''$  for [FA]Mn(H<sub>2</sub>POO)<sub>3</sub> sample. The characteristic dipolar relaxation peaks shift to higher frequencies with increasing temperature, P2 process tends to Arrhenius behaviour while P1 process follows the VFT dependence. (d) The estimated relaxation times of FA<sup>+</sup> motion as a function of inverse temperature. Dash line corresponds to the structural phase transition temperature.

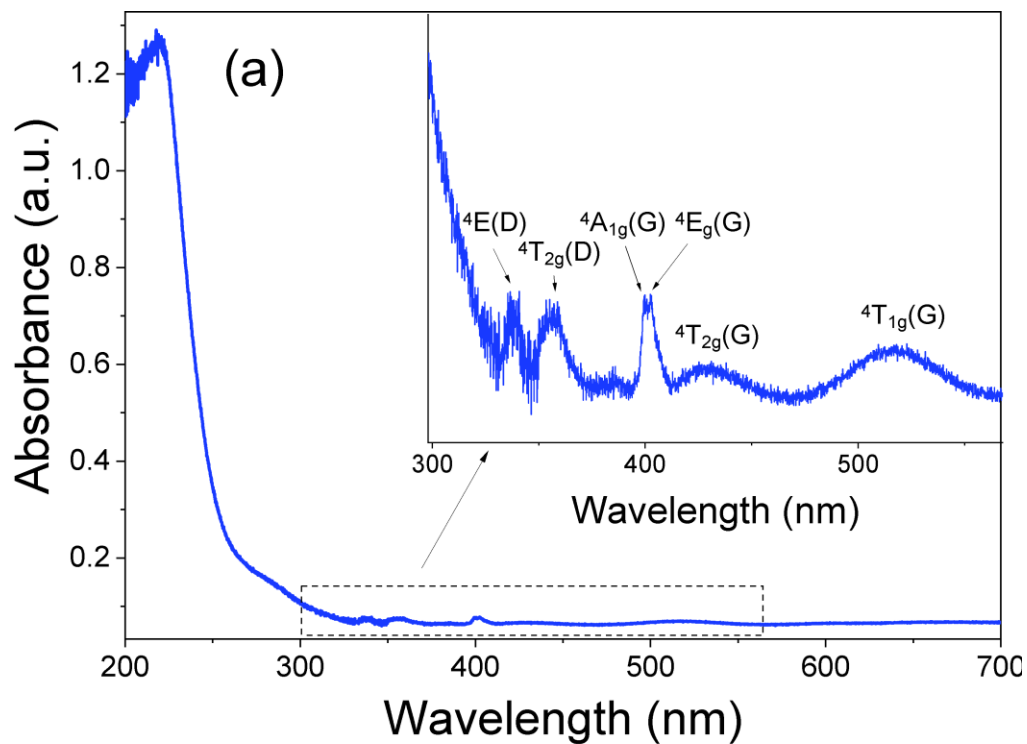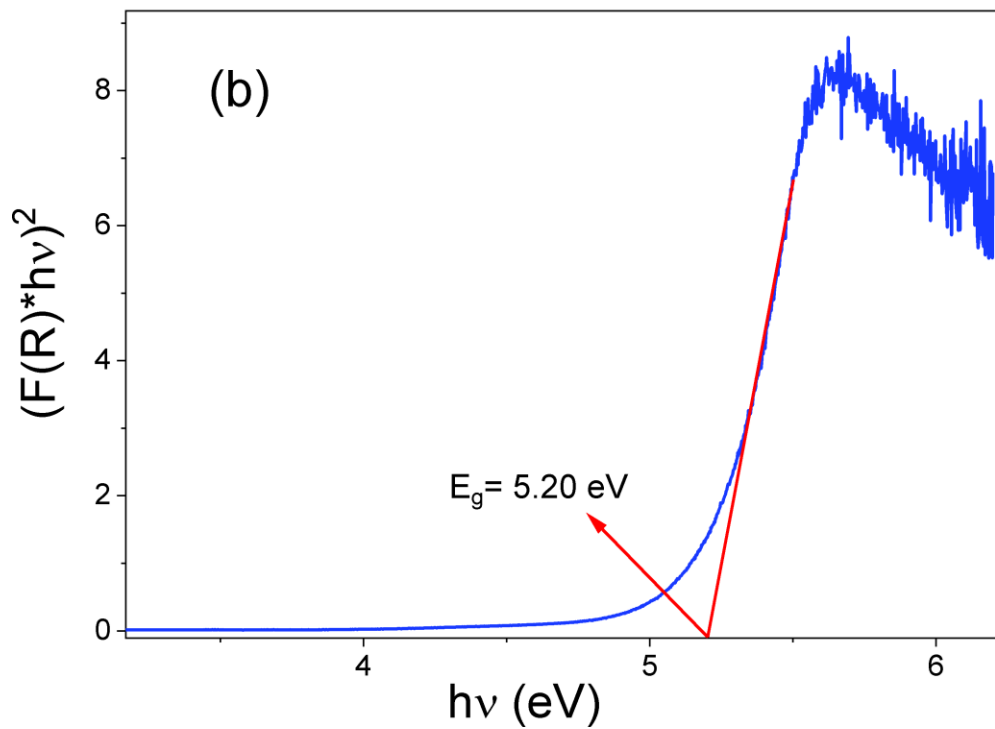

Figure S14. (a) Absorption spectrum of  $[\text{FA}]\text{Mn}(\text{H}_2\text{POO})_3$  recorded at 300 K and (b) the energy bandgap determined using Kubelka – Munk function.

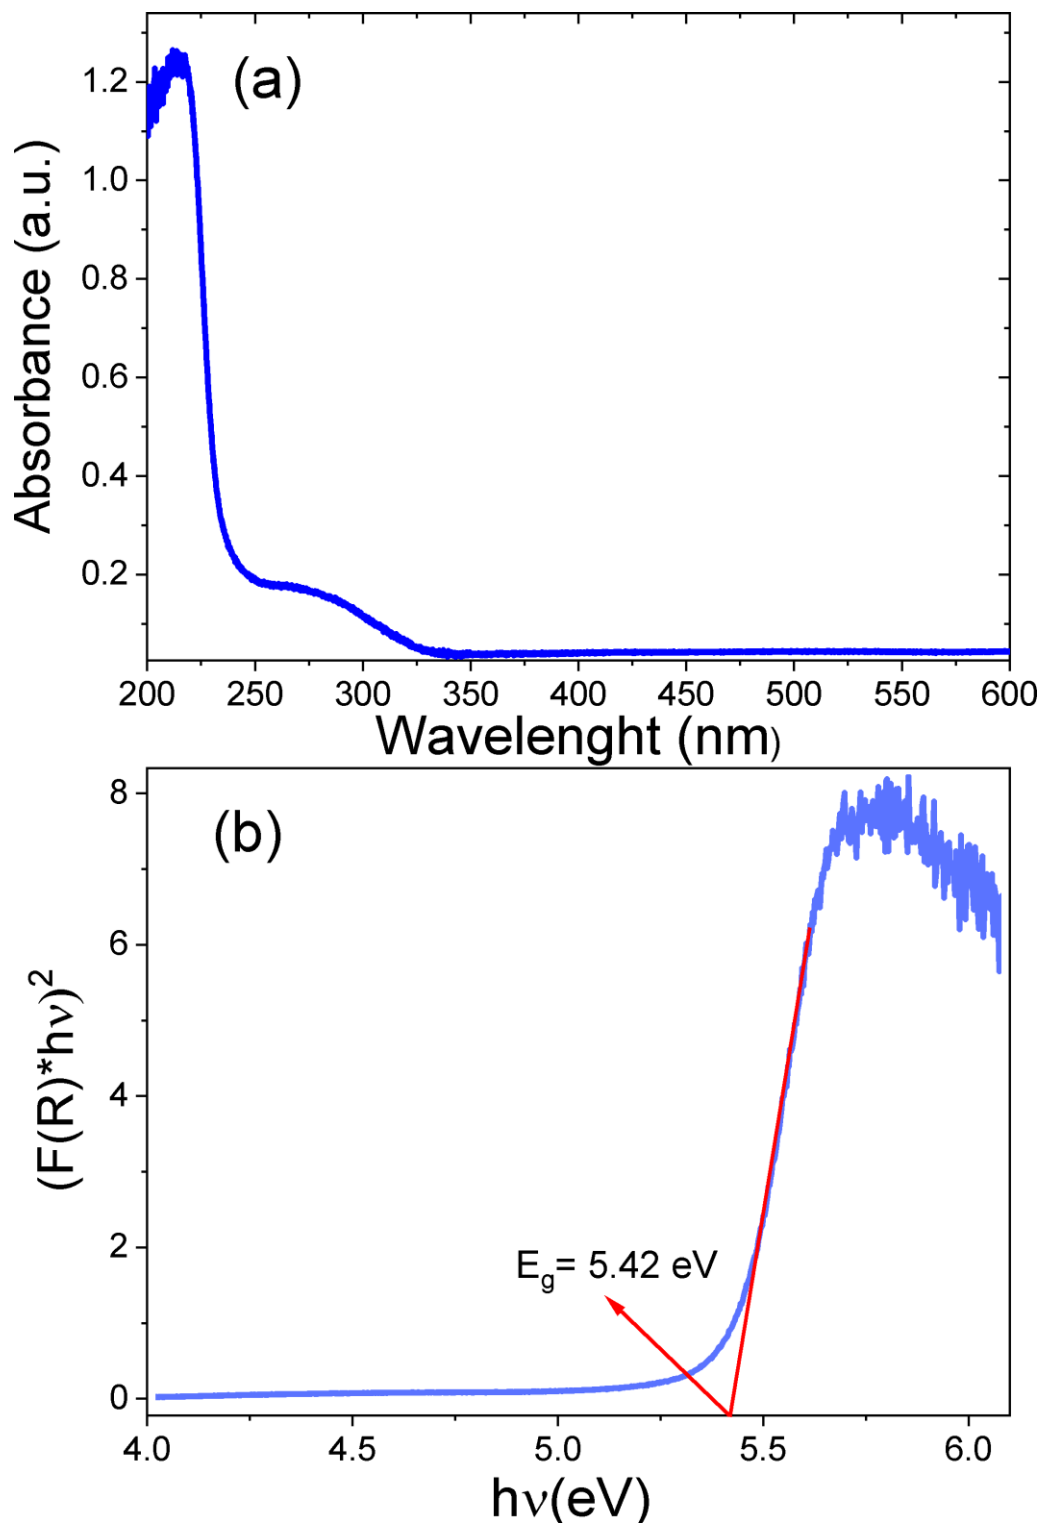

Figure S15. (a) Absorption spectrum of [FA]Cd(H<sub>2</sub>POO)<sub>3</sub> recorded at 300 K and (b) the energy bandgap determined using Kubelka – Munk function.

CIE 1931

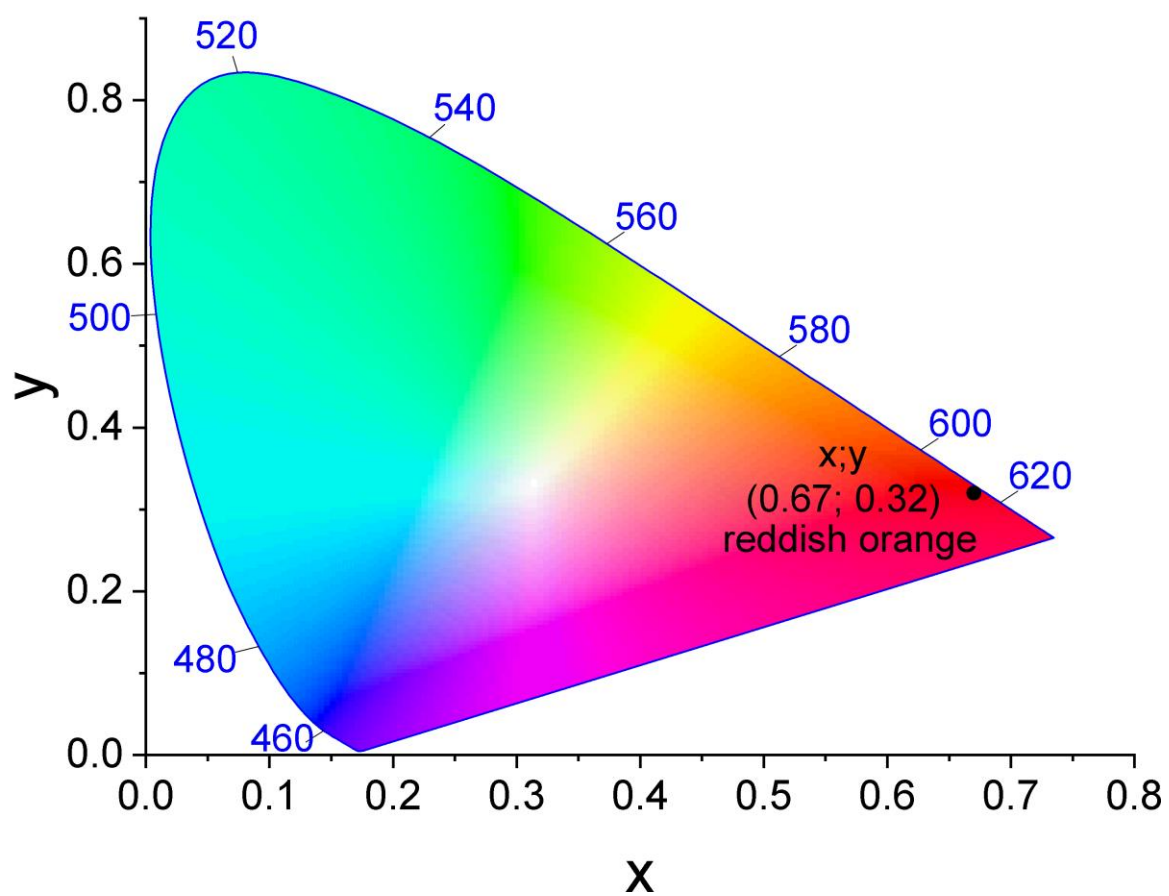

Figure S16. CIE coordinate for [FA]Mn(H<sub>2</sub>POO)<sub>3</sub>.



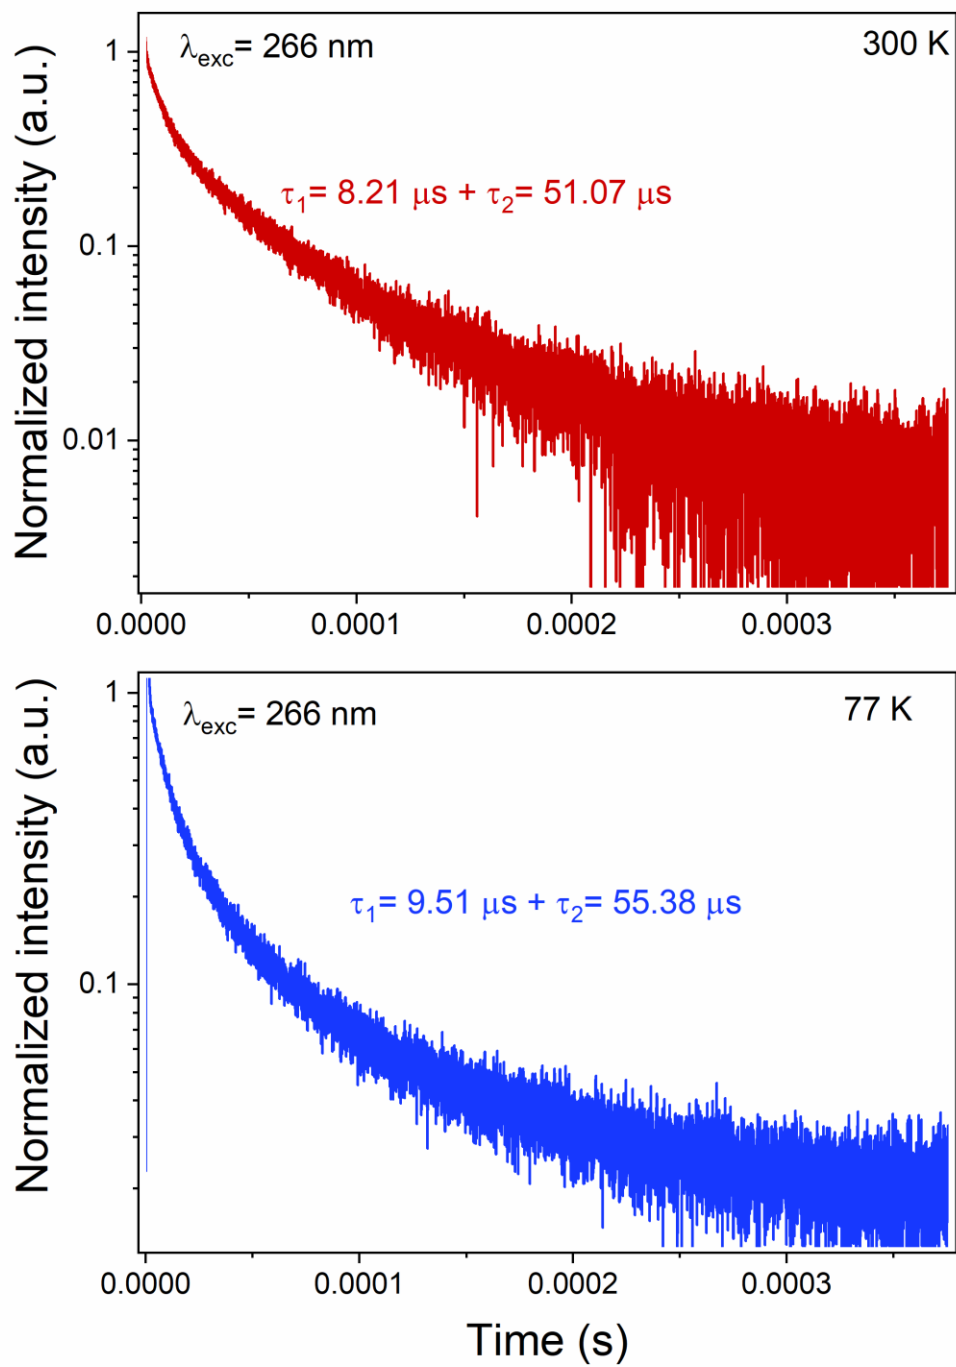

Figure S17. Emission decay curves of  $[\text{FA}]\text{Mn}(\text{H}_2\text{POO})_3$  at 77 and 300 K.

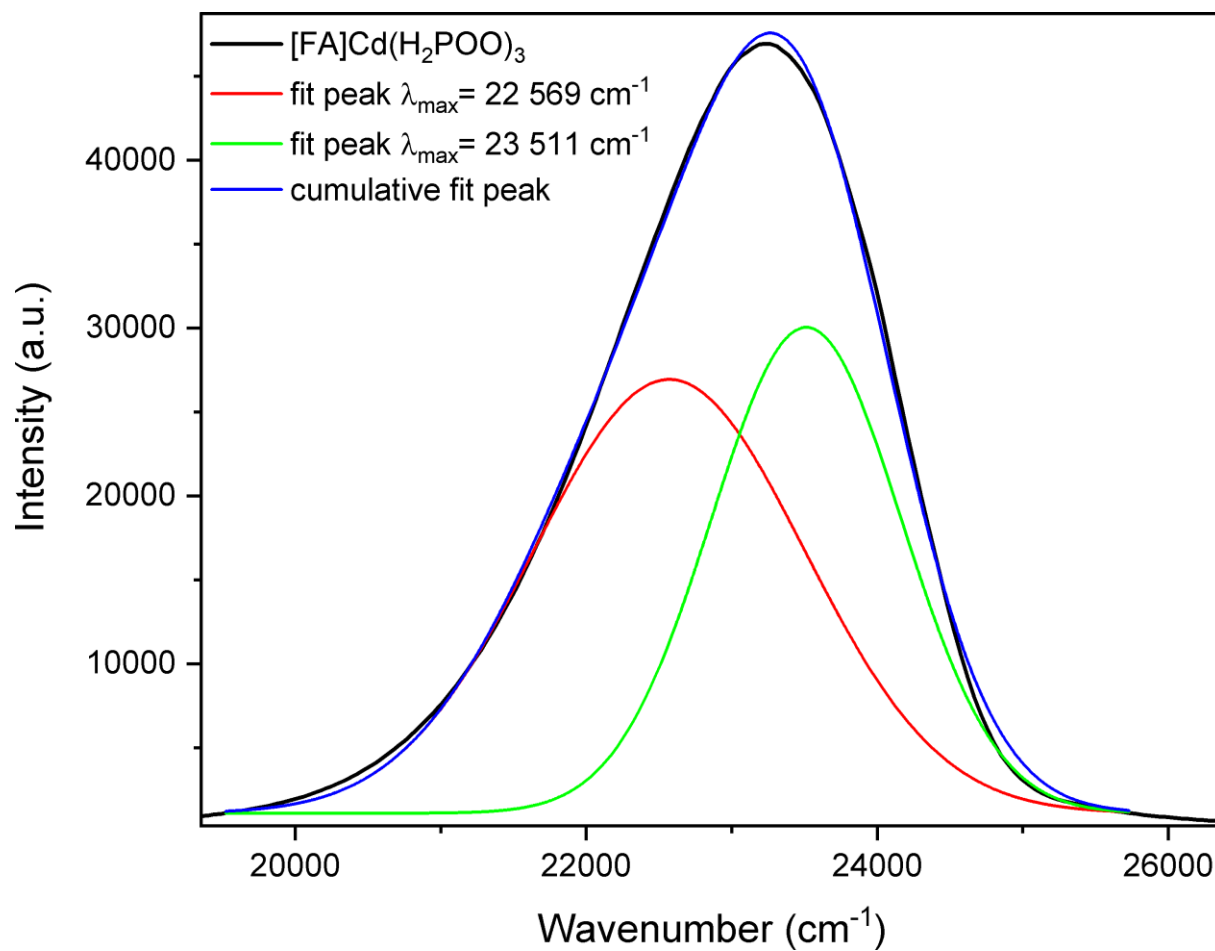

Figure S18. Deconvolution of emission spectrum of [FA]Cd(H<sub>2</sub>POO)<sub>3</sub> recorded under 266 nm at 80 K.

## CIE 1931

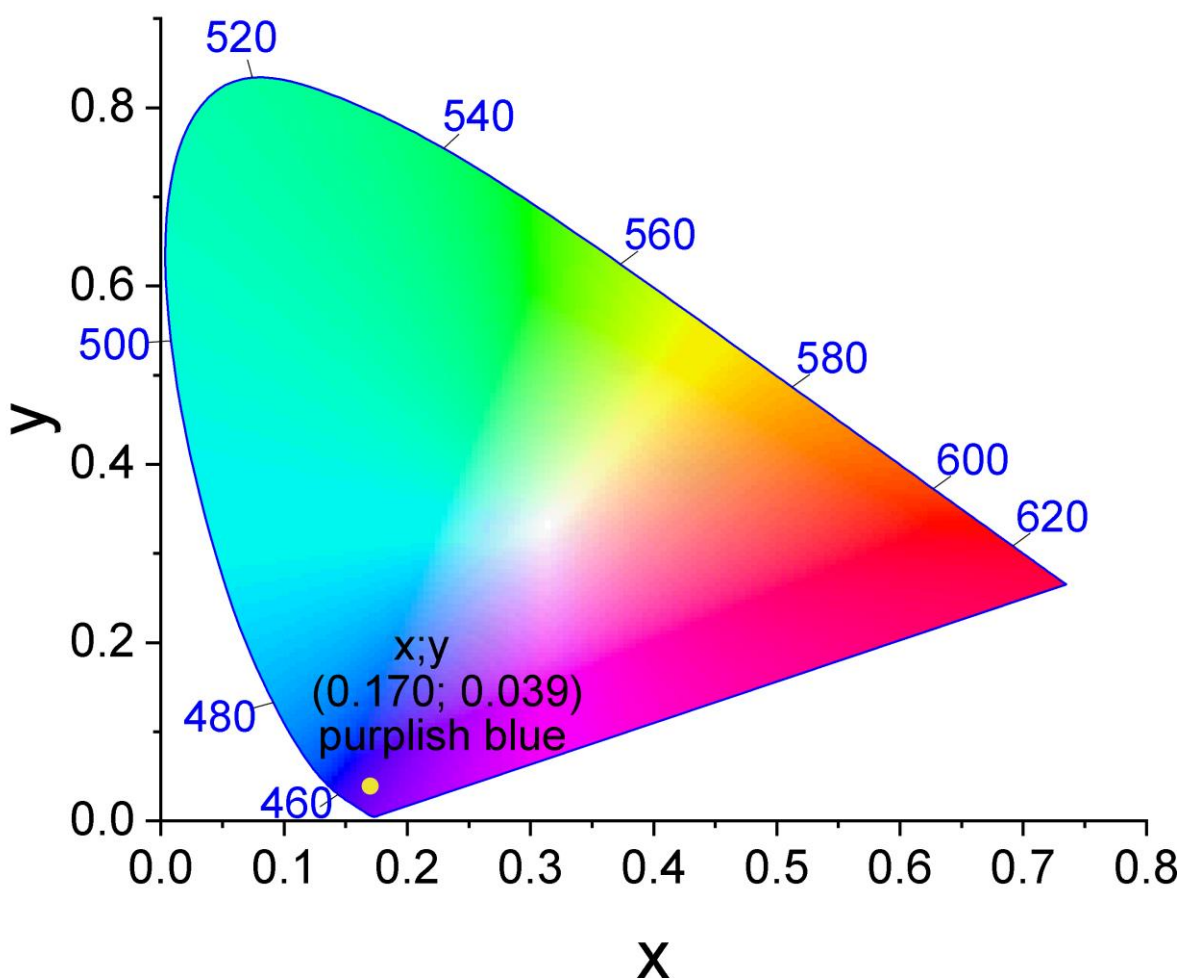

Figure S19. CIE coordinate for  $[\text{FA}]\text{Cd}(\text{H}_2\text{POO})_3$ .

[1] M. E. Fleet, *Mineral. Mag.*; 1976, **40**, 531-533.

[2] H. L. B. Boström, J. A. Hill and A. L. Goodwin, *Columnar shifts as symmetry-breaking degrees of freedom in molecular perovskites*, *Phys. Chem. Chem. Phys.*, 2016, **18**, 31881–31894.

[3] H. L. B. Boström, *Tilts and shifts in molecular perovskites*, *CrystEngComm*, 2020, **22**, 961-968.
